# Supplementary material for: Atmospheric photolytic reduction of Hg(ii) in dry aerosols
Source: Royal Society of Chemistry journal article supplement (doi:10.1039/c3em00249g), 2013-01-01
Supplement: c3em00249g.pdf [file c3em00249g.pdf]

**Supplemental Information for**  
**Atmospheric Photolytic Reduction of Hg(II) in Dry Aerosols**

Yindong Tong<sup>1,2</sup>, Terry Eichhorst<sup>1,3</sup>, Michael R. Olson<sup>1</sup>, Jerome E. McGinnis<sup>1</sup>,  
Isabel Turner<sup>1</sup>, Andrew P. Rutter<sup>1</sup>, Martin M. Shafer<sup>1,3</sup>, Xuejun Wang<sup>2</sup>, James J.  
Schauer<sup>1,3</sup>

1. Environmental Chemistry and Technology Program, University of Wisconsin-Madison, 660 N. Park St, Madison, WI 53706, USA.
2. Ministry of Education Laboratory of Earth Surface Processes// College of Urban and Environmental Sciences, Peking University, Beijing 100871, China.
3. Wisconsin State Laboratory of Hygiene, 2601 Agriculture Drive, Madison, WI 53718, USA.

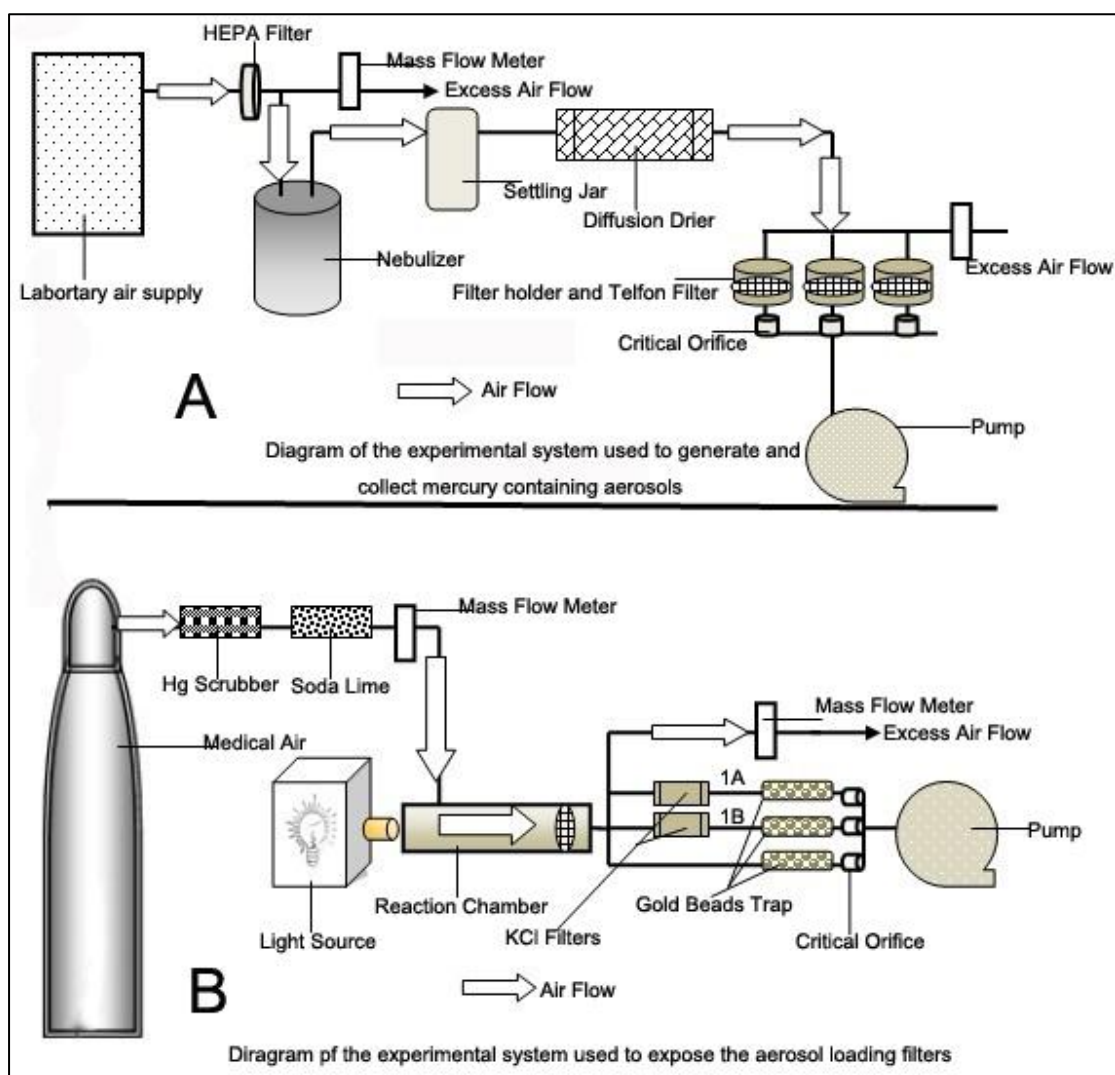

**Figure S1. Diagrams of the experimental systems for aerosol generation, collection and mercury reduction experiments**

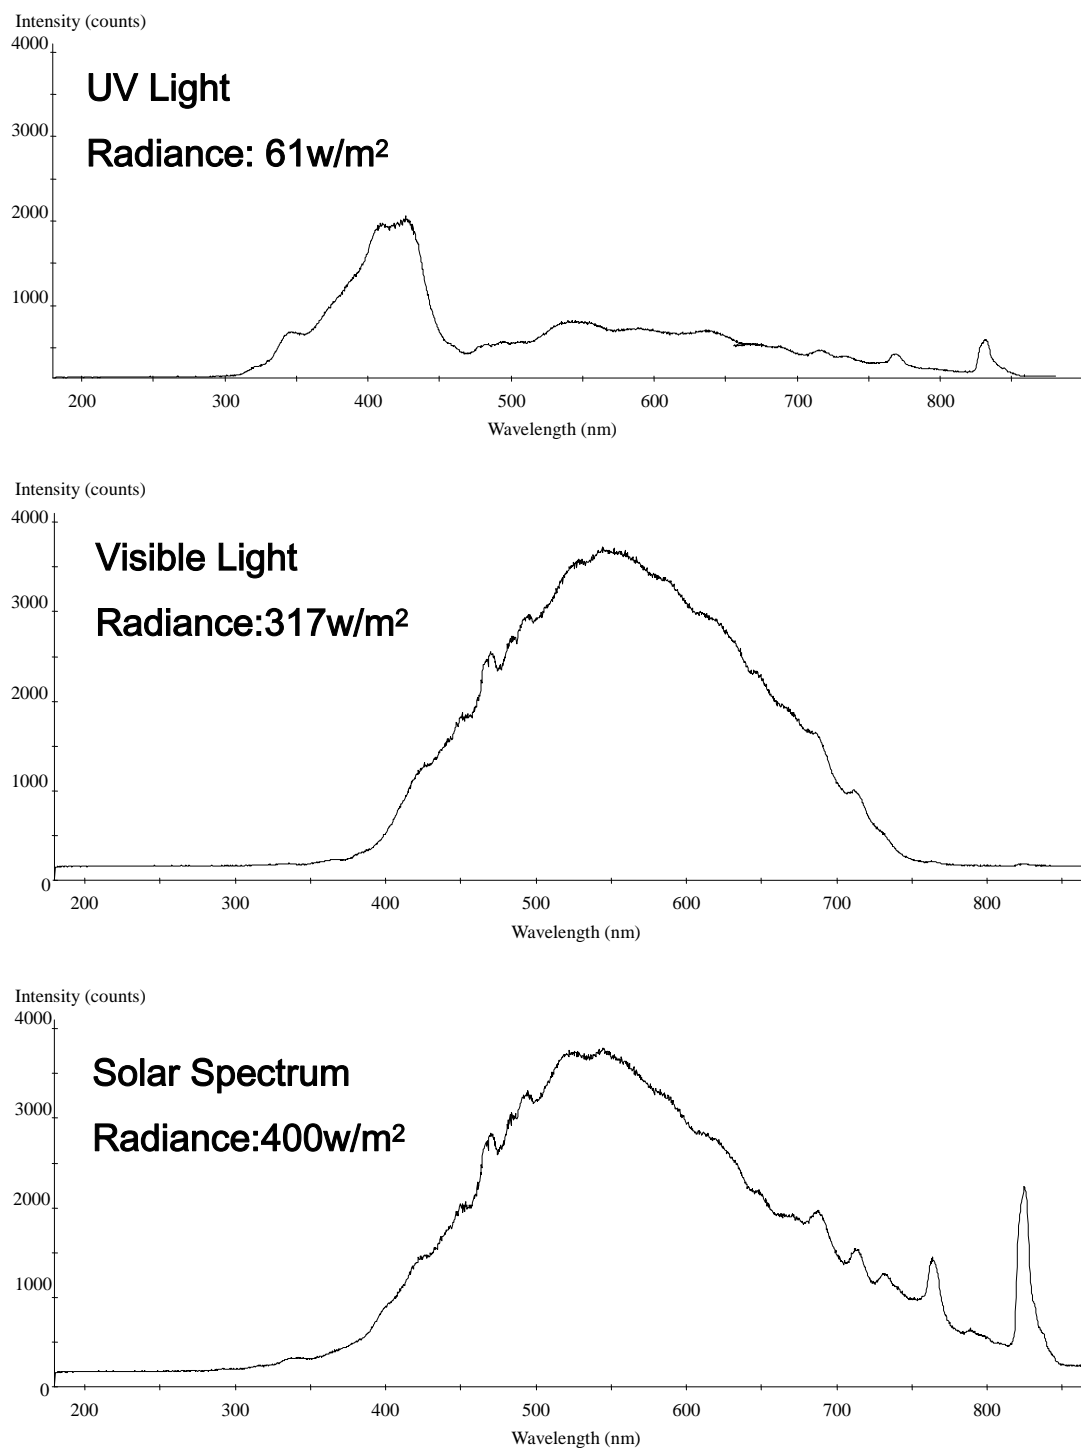

**Figure S2. Spectrums of the light sources used in the mercury reduction tests**

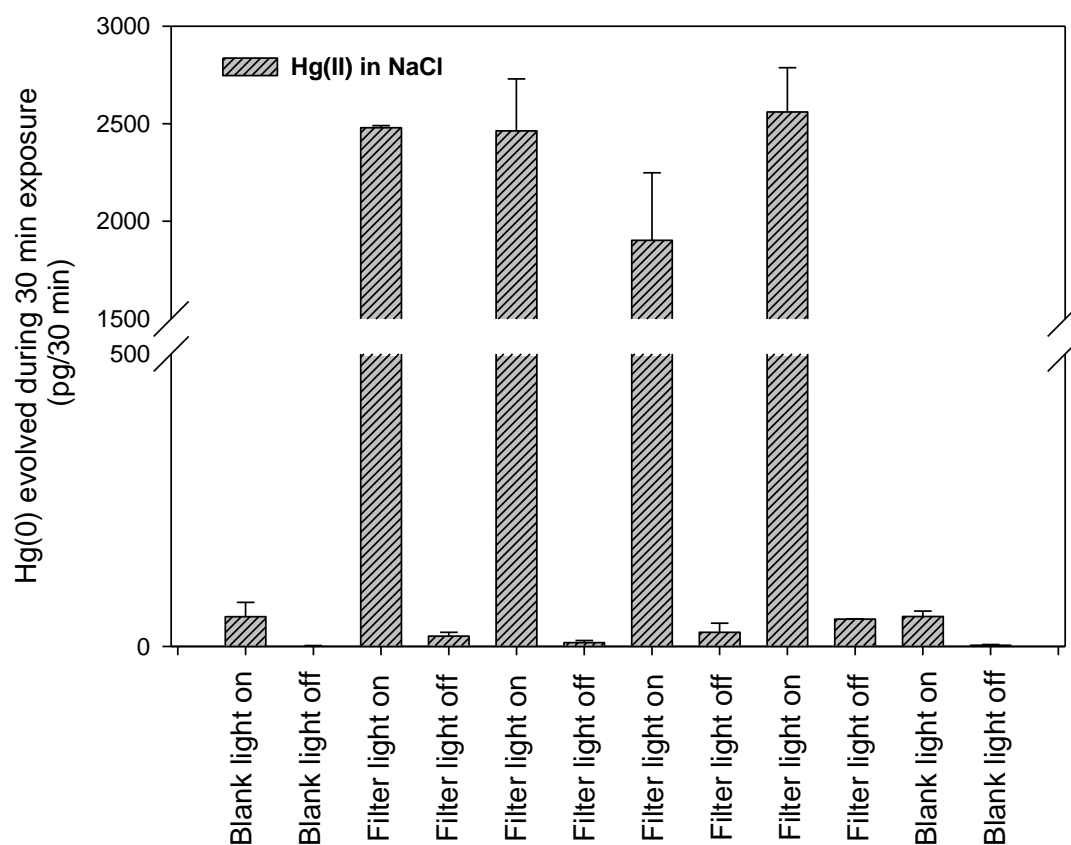

\*For the blank test, the value is expressed by the total Hg(0) emission, while for the filters, the values is expressed by the Hg(0) evolved per 1 mg loading weight.

**Fig S3. Hg(0) evolved during continuous blank and exposure test under UV light**

**Table S1. Estimated NaCl, FeCl<sub>3</sub> and FeCl<sub>2</sub>, and measured Hg(II) values of the synthetic aerosol particles**

| Matrix compounds                                    | Estimated values<br>(ng/mg) |                      |                      |                      | Measured values<br>(ng/mg) |
|-----------------------------------------------------|-----------------------------|----------------------|----------------------|----------------------|----------------------------|
|                                                     | NaCl                        | FeCl <sub>3</sub>    | FeCl <sub>2</sub>    | DFO                  | Hg                         |
| NaCl and HgCl <sub>2</sub>                          | 1.00×10 <sup>6</sup>        | 0                    | 0                    | 0                    | 140.16                     |
| NaCl, FeCl <sub>3</sub> and HgCl <sub>2</sub>       | 7.83×10 <sup>5</sup>        | 2.17×10 <sup>5</sup> | 0                    | 0                    | 120.06                     |
| NaCl, FeCl <sub>2</sub> and HgCl <sub>2</sub>       | 8.22×10 <sup>3</sup>        | 0                    | 1.78×10 <sup>3</sup> | 0                    | 159.33                     |
| NaCl, FeCl <sub>3</sub> , DFO and HgCl <sub>2</sub> | 4.16×10 <sup>3</sup>        | 1.16×10 <sup>3</sup> | 0                    | 4.68×10 <sup>3</sup> | 85.53                      |

**Table S2. Percent of Hg(0) evolved during 30 min exposure for the matrix compounds under different light sources**

| Matrix compounds | NaCl and HgCl <sub>2</sub> /% |      |      | NaCl, FeCl <sub>3</sub> and HgCl <sub>2</sub> /% |      |      | NaCl, FeCl <sub>2</sub> and HgCl <sub>2</sub> /% |      |      | NaCl, DFO, FeCl <sub>3</sub> and HgCl <sub>2</sub> /% |      |      |
|------------------|-------------------------------|------|------|--------------------------------------------------|------|------|--------------------------------------------------|------|------|-------------------------------------------------------|------|------|
| UV light         | 1.95                          | 1.15 | 1.41 | 0.03                                             | 0.04 | 0.01 | 0.66                                             | 0.72 | 0.57 | —                                                     | —    | —    |
| Visible light    | 5.27                          | 7.64 | 6.13 | 0.20                                             | 0.26 | 0.30 | 0.84                                             | 1.10 | 1.27 | —                                                     | —    | —    |
| Solar spectrum   | 11.13                         | 8.88 | 9.64 | 2.17                                             | 0.99 | 0.82 | 5.55                                             | 7.56 | 5.11 | 7.08                                                  | 5.15 | 4.90 |
